# Supplementary material
Source: PubMed Central journal article supplement (PMC7111589)

## SUPPLEMENTARY MATERIALS

Supplemental Fig 1. IF staining of mouse liver tissues with rabbit anti-vinculin (red) antibody (A), normal rabbit IgGs (B), mouse anti-talin (green) antibody (C), and normal mouse IgGs (D). Nuclei were counter-stained with DAPI (Blue). Scale bars indicate 20  $\mu$ m.

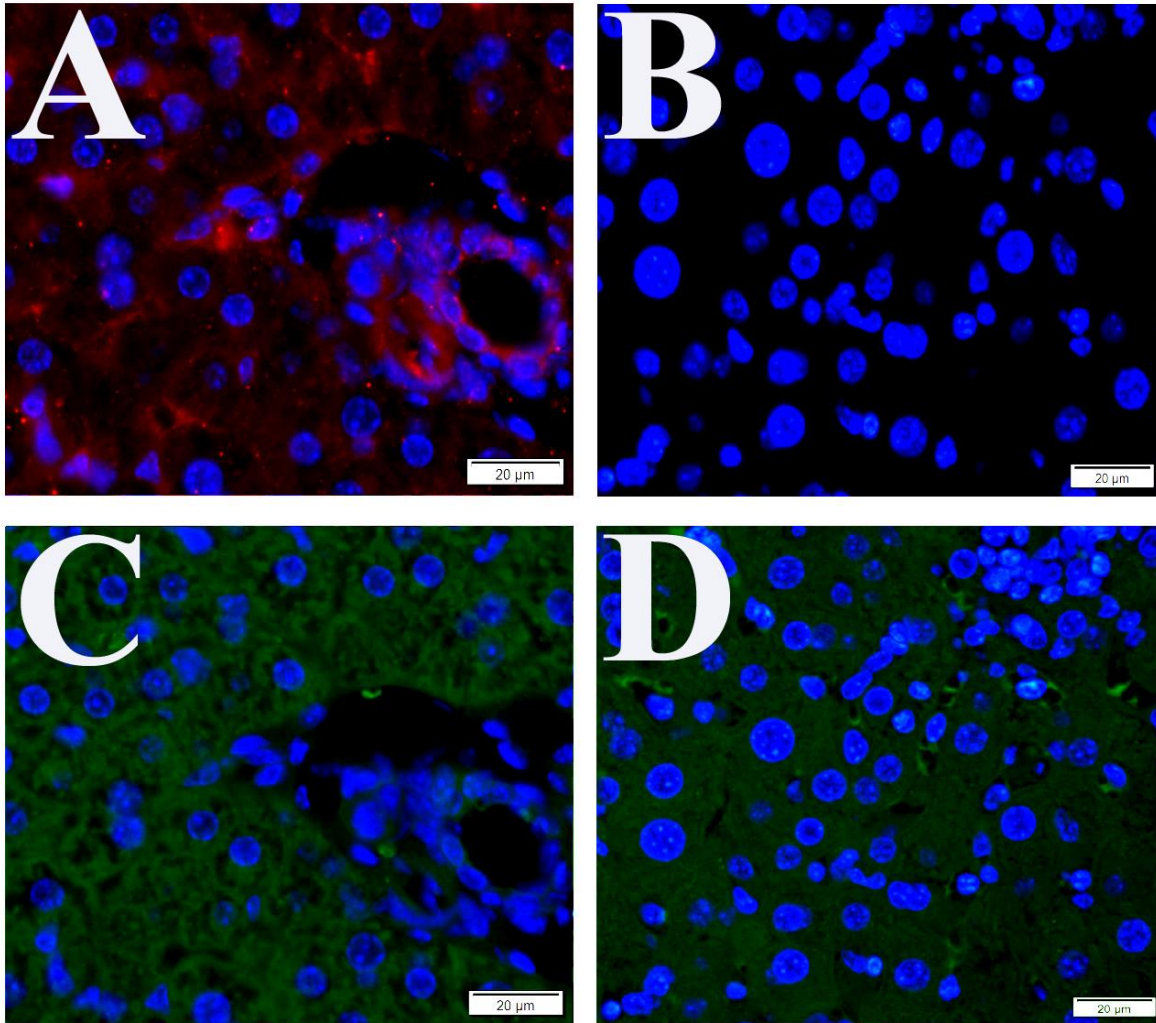

Supplemental Fig 2. Representative PLA images captured with 3D confocal microscopy of TVSPs in SFGR infected liver tissues.

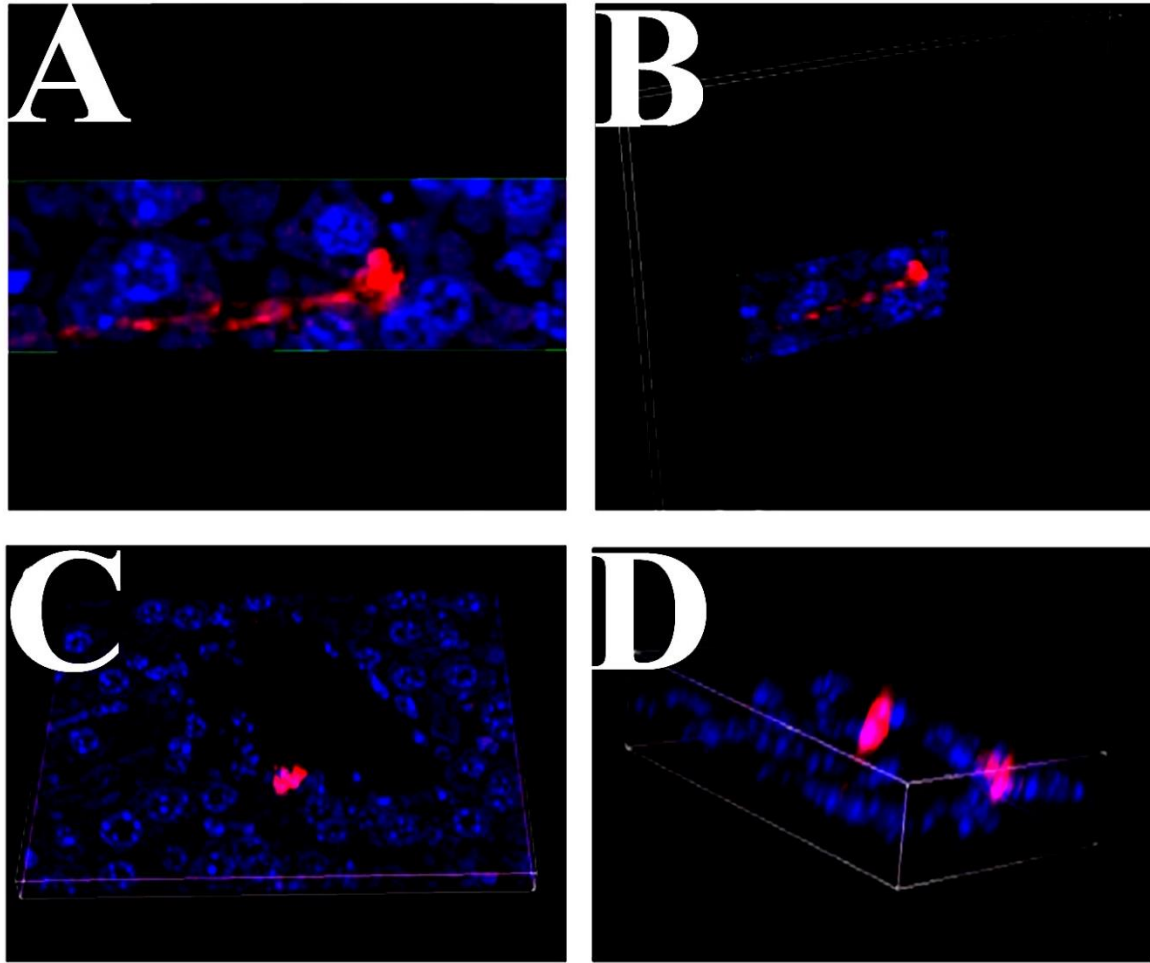

Supplemental Fig 3. Talin-vinculin PLA assay coupling fluorescent phalloidin staining. WT-mock of BSL3 (A1, B1, and C1), lethal WT-*R. australis* infection (A2, B2, and C2), WT survivor on day 19 after SFGR infection (A3-4, B3-4, and C3-4), WT-mock of BSL4 (A5, B5, and C5), WT survivor on day 21 after EBOV infection (A6, B6, and C6). Only PLA signals before staining with phalloidin of WT survivor on day 21 after EBOV infection (A7, B7, and C7). PLA assay coupling fluorescent phalloidin staining in normal HUVECs (A8, B8, and C8). H&E staining of WT-mock of BSL3 (D1), WT survivor on day 19 after SFGR infection (D3), WT-mock of BSL4 (D5), and WT survivor on day 21 after EBOV infection (D6). Nuclei were counter-stained with DAPI (Blue). Scale bars indicate 20  $\mu\text{m}$ .

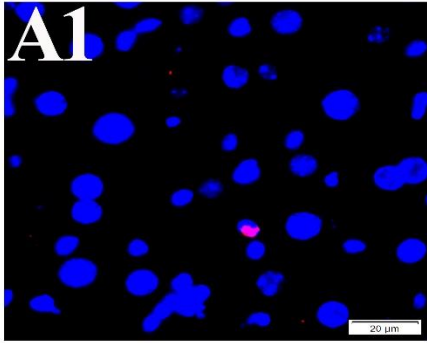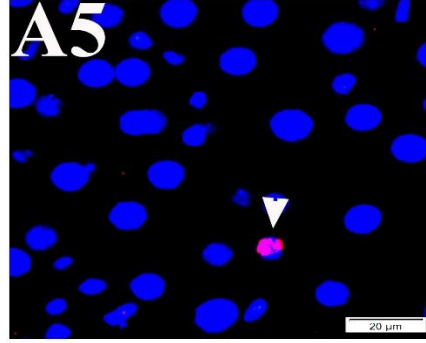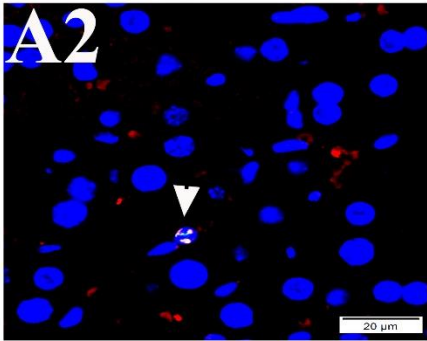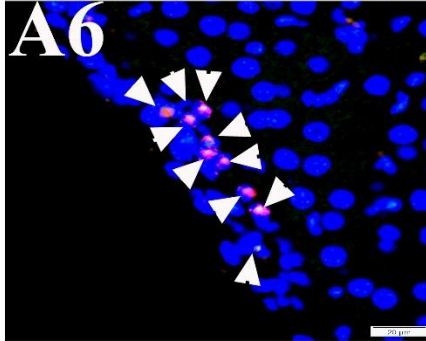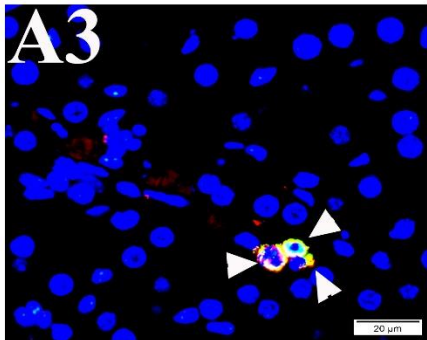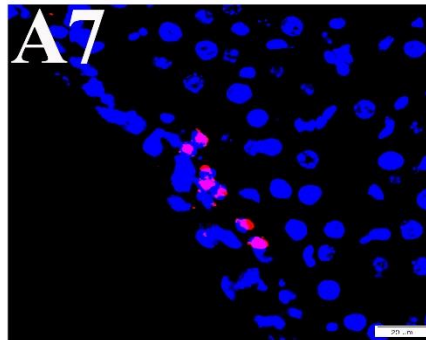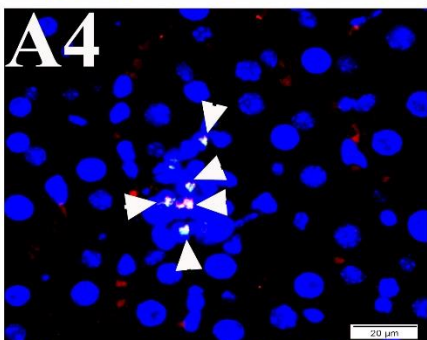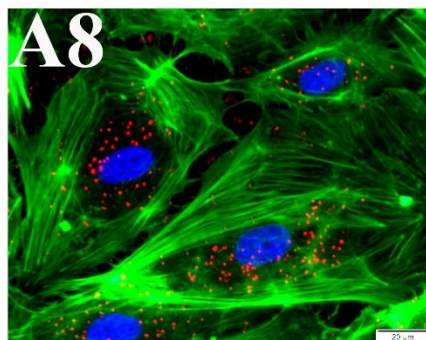

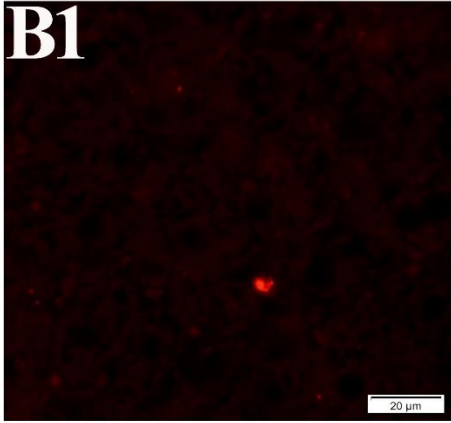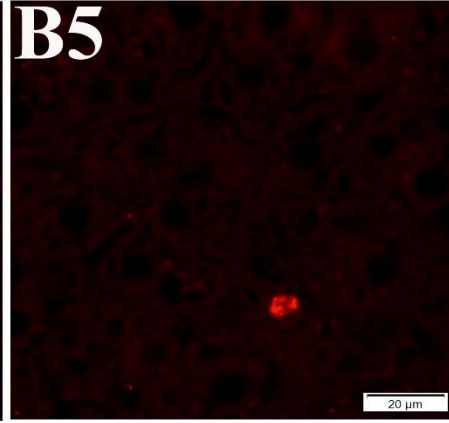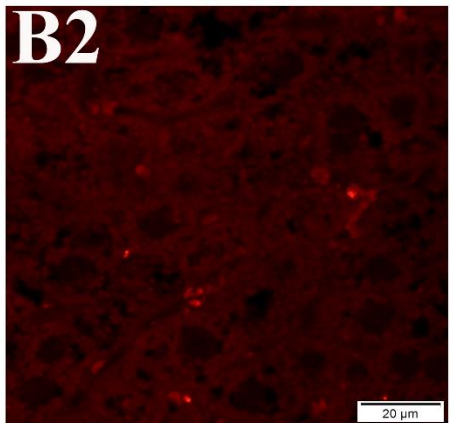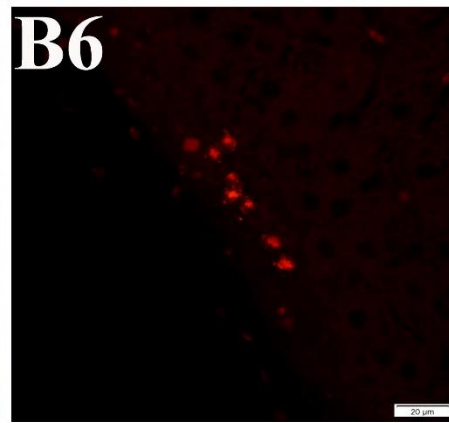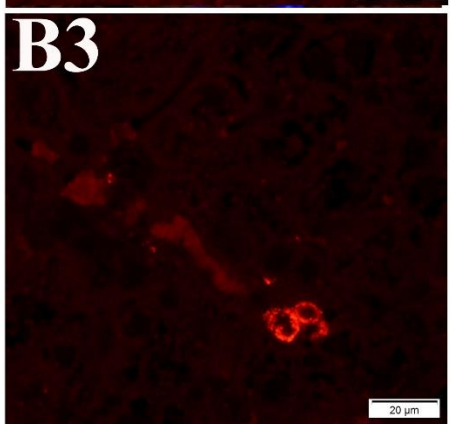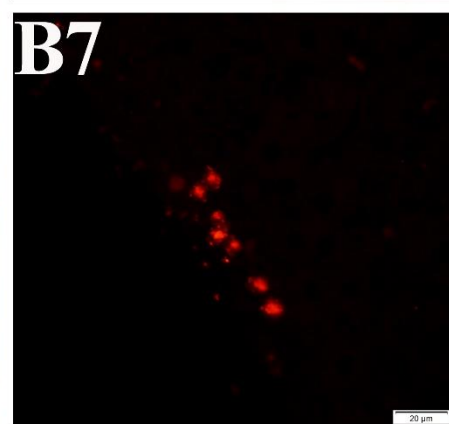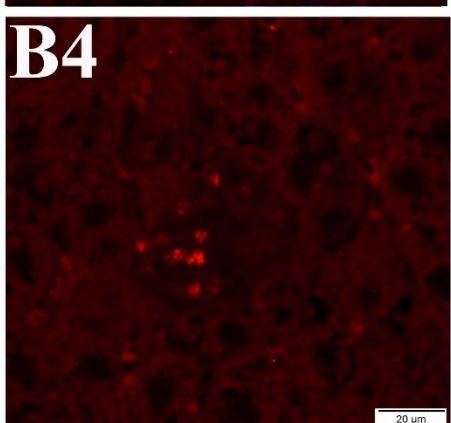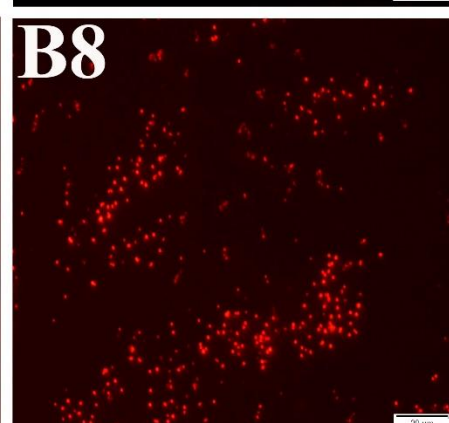

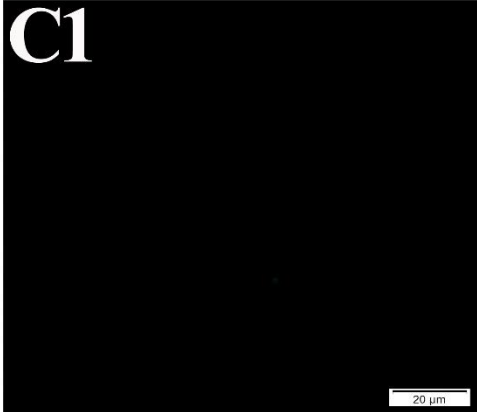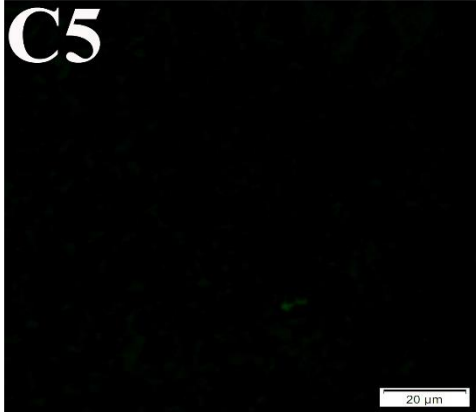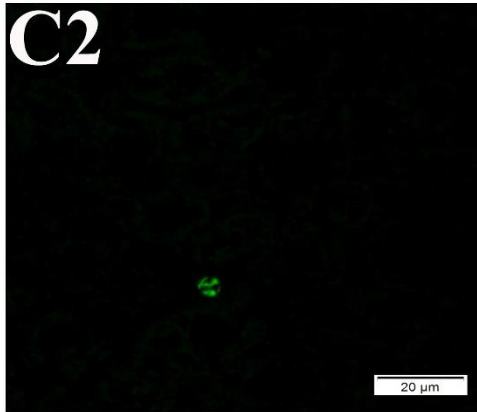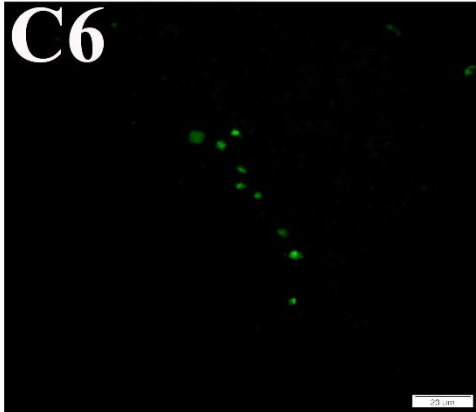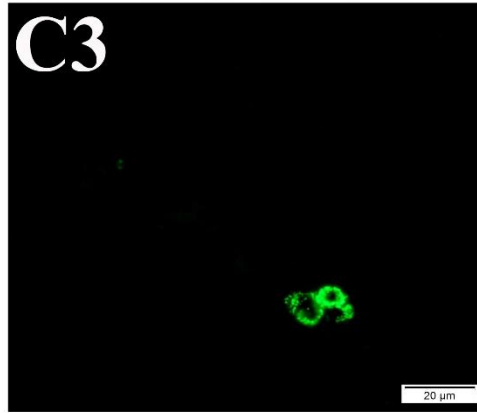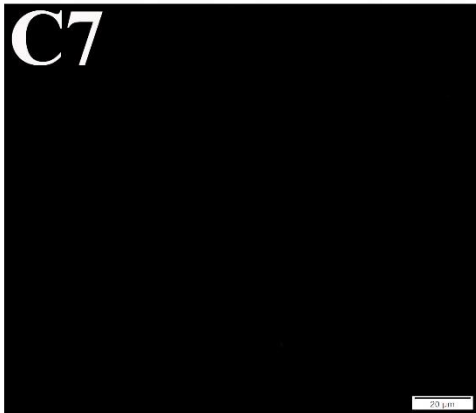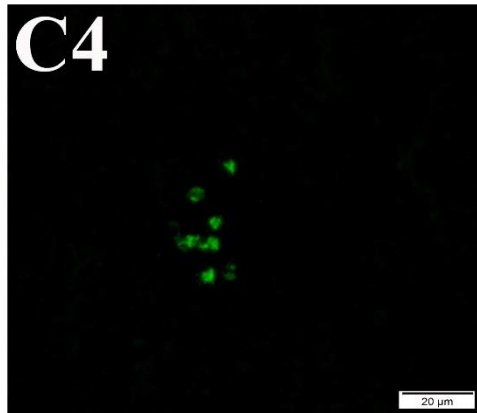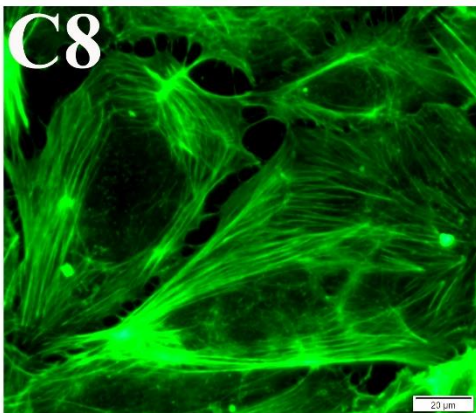

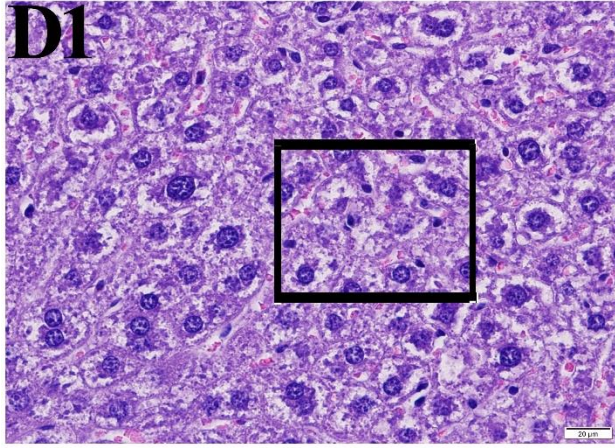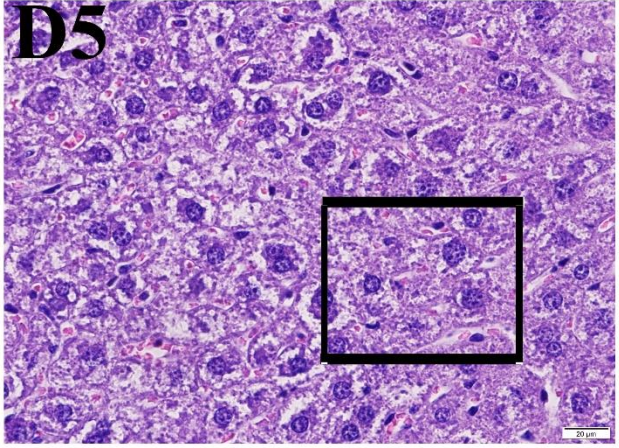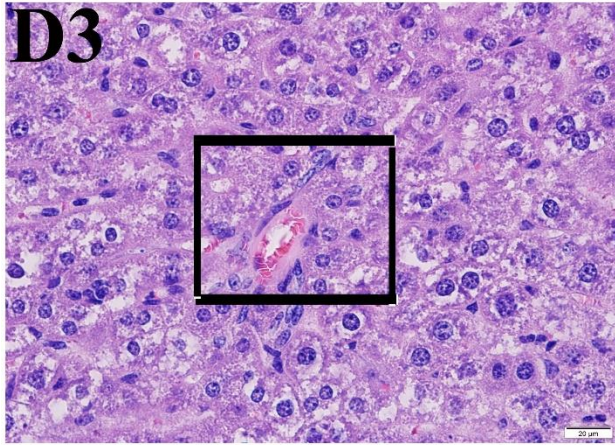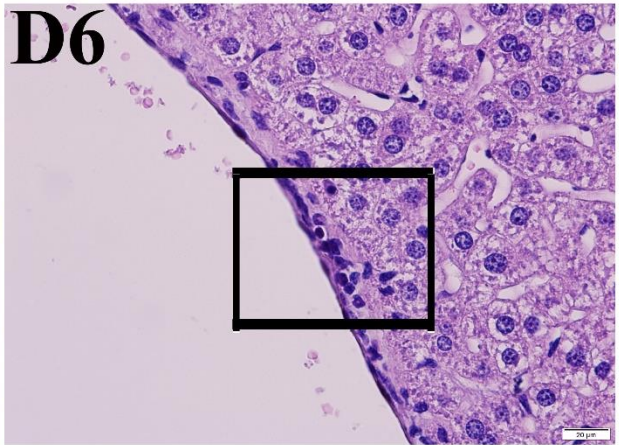

Supplement: 41374_2020_420_MOESM1_ESM.pdf [file 41374_2020_420_MOESM1_ESM.pdf]
